# Supplementary material for: Potential for Electric Vehicle Adoption to Mitigate Extreme Air Quality Events in China
Source: PubMed Central journal article supplement (PMC7970456; doi:10.1029/2020ef001788), 2021-02-12
Supplement: NIHMS1674730-supplement-1.pdf [file NIHMS1674730-supplement-1.pdf]

### References From the Supporting Information

- Aunan, K., & Pan, X.-C. (2004). Exposure–response functions for health effects of ambient air pollution applicable for China—A meta-analysis. *Science of the Total Environment*, 329, 3–16. <https://doi.org/10.1016/j.scitotenv.2004.03.008>
- Beijing Municipal Bureau of Public Health (BMBPH) (2012). *Beijing Health Yearbook*. Beijing, China: Beijing Science and Technology Press.

- Jing, L., et al. (2000). Relationship between air pollution and acute and chronic respiratory diseases in Benxi. *Journal of Environmental Health*, 17, 268–270.
- Xie, P., Liu, X., Liu, Z., Li, T., & Bai, Y. (2009). Exposure–response functions for health effects of ambient particulate matter pollution applicable for China. *China Environmental Science*, 29, 1034–1040.
- Xu, X., Dockery, D. W., Christiani, D. C., Li, B., & Huang, H. (1995). Association of air pollution with hospital outpatient visits in Beijing. *Archives of Environmental Health*, 50, 214–220. <https://doi.org/10.1080/00039896.1995.9940390>
- Zhang, M., Song, Y., & Cai, X. (2007). A health-based assessment of particulate air pollution in urban areas of Beijing in 2000–2004. *Science of the Total Environment*, 376, 100–108. <https://doi.org/10.1016/j.scitotenv.2007.01.085>
