# Supplementary material for: Potential for Electric Vehicle Adoption to Mitigate Extreme Air Quality Events in China
Source: PubMed Central journal article supplement (PMC7970456; doi:10.1029/2020ef001788), 2021-02-12
Supplement: NIHMS1674730-supplement-Supplement1.pdf [file NIHMS1674730-supplement-Supplement1.pdf]

**Potential for electric vehicle adoption to mitigate extreme air quality events in China**

**J. L. Schnell<sup>1,2</sup>, D. R. Peters<sup>3,4</sup>, D. C. Wong<sup>5</sup>, X. Lu<sup>6</sup>, H. Guo<sup>7</sup>, H. Zhang<sup>8</sup>, P. L. Kinney<sup>9</sup>, and D. E. Horton<sup>1</sup>**

<sup>1</sup>Department of Earth and Planetary Sciences and Institute for Sustainability and Energy at Northwestern University, Evanston, Illinois, USA

<sup>2</sup>Cooperative Institute for Research in Environmental Sciences at the University of Colorado Boulder NOAA/Global Systems Laboratory, Boulder, Colorado, USA

<sup>3</sup>Program in Environmental Sciences, Northwestern University, Evanston, Illinois, USA

<sup>4</sup>Environmental Defense Fund, Austin, Texas, USA

<sup>5</sup>US Environmental Protection Agency, Research Triangle Park, North Carolina, USA

<sup>6</sup>School of Environment, State Key Joint Laboratory of Environment Simulation and Pollution Control, Tsinghua University, Beijing, China

<sup>7</sup>Department of Earth System Science, University of California Irvine, California, USA

<sup>8</sup>Department of Environmental Science and Engineering, Fudan University, Shanghai, China

<sup>9</sup>Department of Environmental Health, Boston University School of Public Health, Boston, Massachusetts, USA

Corresponding author: Jordan Schnell ([jordan.schnell@noaa.gov](mailto:jordan.schnell@noaa.gov))

**Contents of this file**

Figures S1 to S5

Tables S1 to S5

**Introduction**

This supplementary information includes figures and tables that provide model evaluation, parameter values, and other summary statistics.

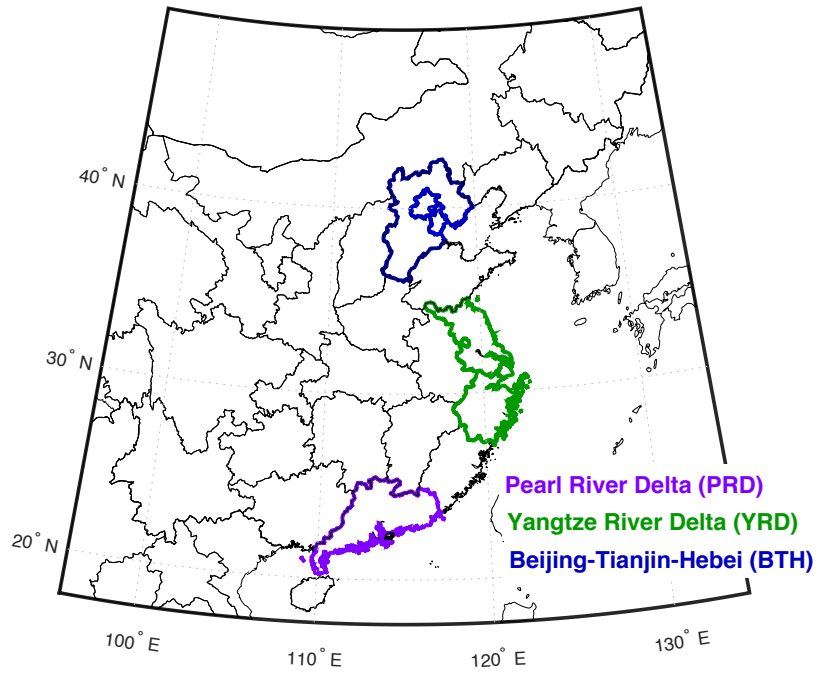

**Figure S1. Major industrialized regions.**

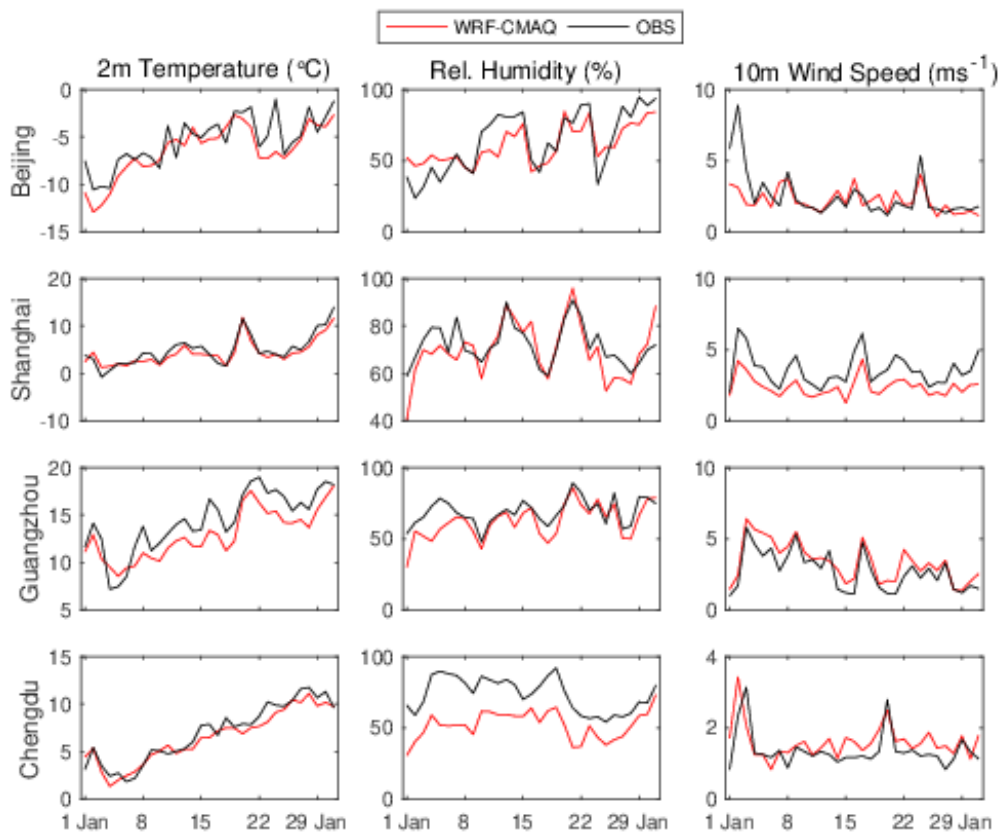

**Figure S2.** Meteorological comparison of WRF-CMAQ (red) against surface observations sites (NOAA NCEP Integrated Surface Database (<https://www.ncdc.noaa.gov/isd/data-access>)) nearest the sites where PM<sub>2.5</sub> is measured.

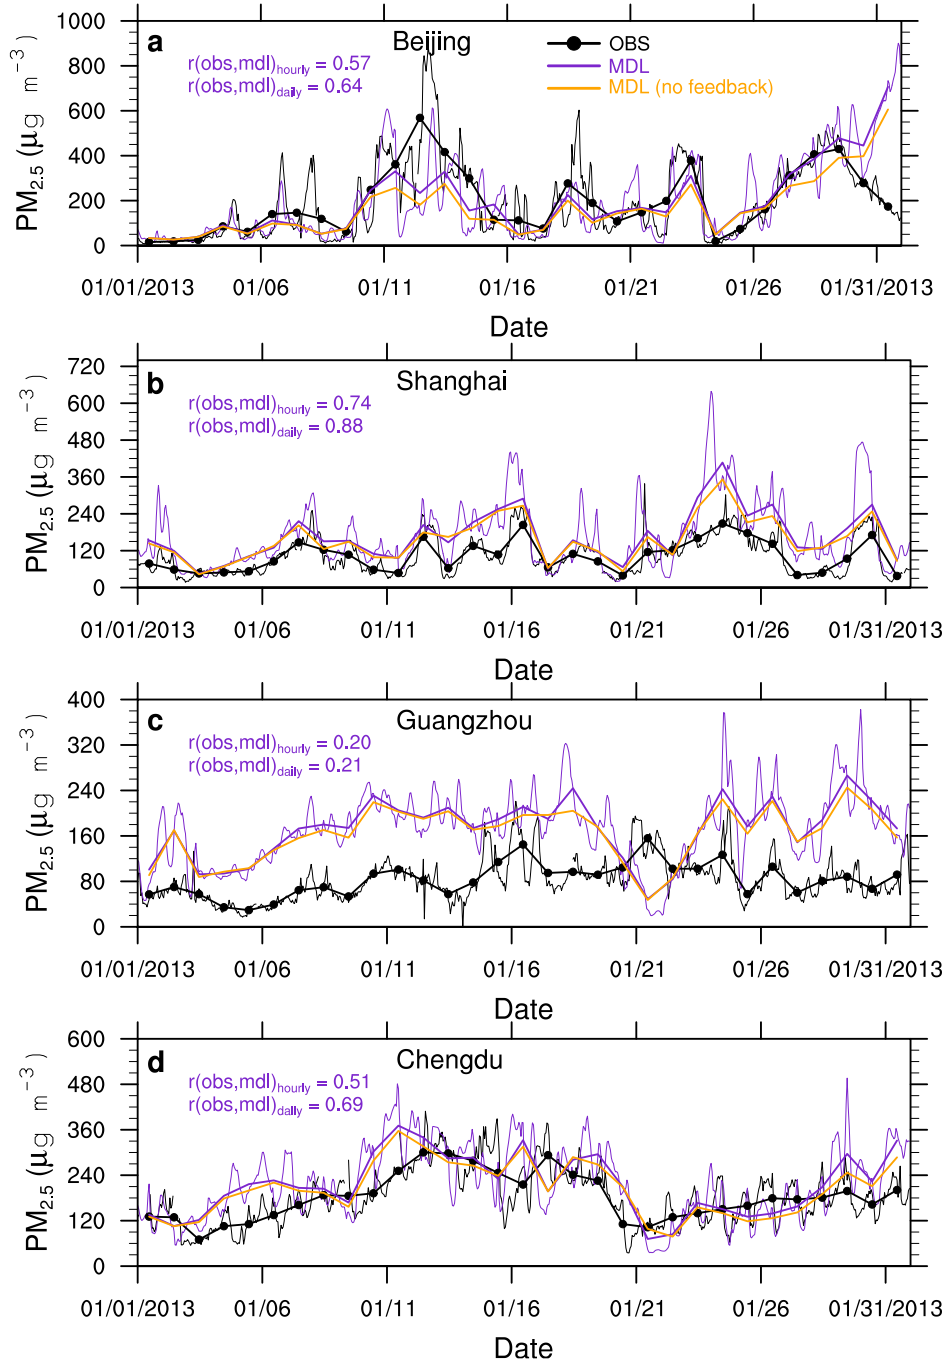

**Figure S3.** Comparison of WRF-CMAQ to U.S. Embassy observations. Purple lines are the single grid cells over the observation sites for *BASE*, orange is the simulation without shortwave aerosol-radiation feedback.

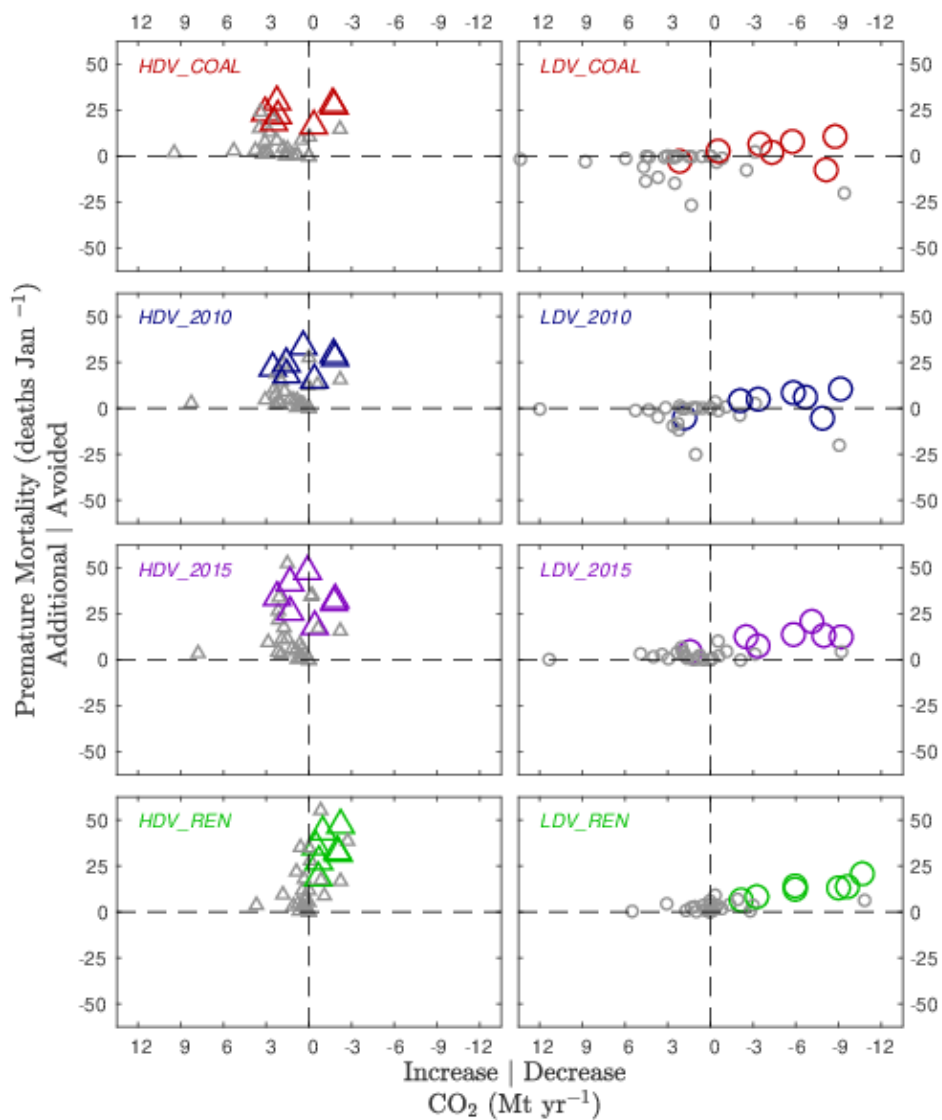

**Figure S4.** Province co-benefits for each experiment. Colored, large markers are provinces in major industrialized regions (Fig. S1).

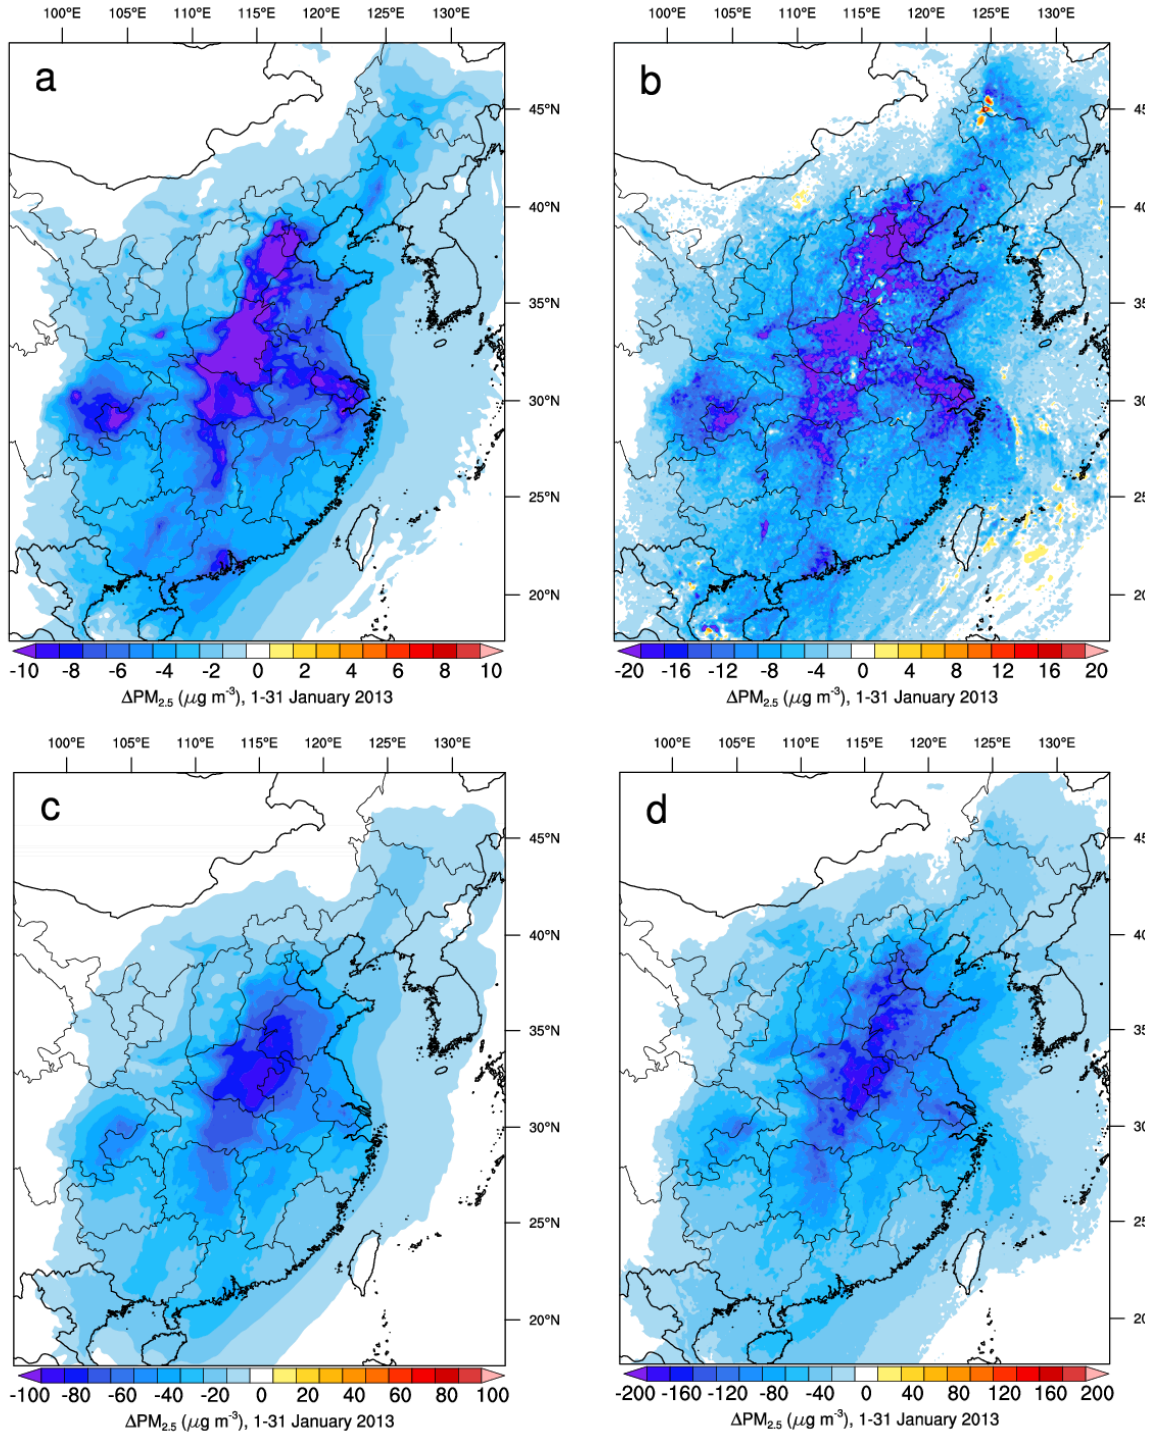

**Figure S5.** Mean (a, c) and (b, d) 95<sup>th</sup> percentile changes for (a, b) NO-TRA and (c, d) NO-ENE.

| Health endpoints                           | $\beta$ (per 10 $\mu\text{g m}^{-3}$ , 95% CI) (%) | References                                | IRs (%)  | References          | Unit Loss (US\$/case) | # BASE  |
|--------------------------------------------|----------------------------------------------------|-------------------------------------------|----------|---------------------|-----------------------|---------|
| Mortality (PM <sub>2.5</sub> )             | 0.22 (0.15, 0.28)                                  | Chen et al. (2017)                        | 0.022377 | BMBPH (2012)        | 273,513.36            | 28539   |
| Mortality (NO <sub>2</sub> )               | 0.9 (0.7, 1.2)                                     | Chen et al. (2018)                        | 0.022377 | BMBPH (2012)        | 273,513.36            | 3013    |
| Respiratory hospital admission             | 2.0 (1.33, 2.67)                                   | Aunan and Pan (2004), Zhang et al. (2007) | 0.051925 | BMBPH (2012)        | 2761.04               | 499305  |
| Cardiovascular hospital                    | 1.17 (0.5, 1.83)                                   | Aunan and Pan (2004), Zhang et al. (2007) | 0.093509 | BMBPH (2012)        | 2761.04               | 572134  |
| Outpatient visits—internal medicine (15 +) | 0.57 (0.32, 0.82)                                  | Xu et al. (1995), Zhang et al. (2007)     | 2.92083  | Zhang et al. (2007) | 83.86                 | 8485238 |
| Outpatient visits—pediatrics (0–14)        | 0.65 (0.23, 1.07)                                  | Xu et al. (1995), Zhang et al. (2007)     | 0.811925 | Zhang et al. (2007) | 83.86                 | 250883  |
| Acute bronchitis                           | 9.17 (3.15, 15.18)                                 | Jing et al. (2000), Zhang et al. (2007)   | 0.140377 | Zhang et al. (2007) | 407.03                | 3542312 |
| Asthma                                     | 2.1(1.45, 2.74)                                    | Xie et al. (2009)                         | 0.215982 | Zhang et al. (2007) | 299.61                | 2159488 |

**Table S1.** Parameters, references, and number of cases for *BASE* for seven health endpoints. Parameters and references are a reproduction of Tables 1 and 2 from Gao et al. (2015).

| Experiment       | $\Delta\text{PM}_{2.5}$ |               |                  | $\Delta\text{NO}_2$ |               |                  | $\Delta\text{CO}_2$ | Avoided Mortality | 10 <sup>6</sup> US\$ Saved |
|------------------|-------------------------|---------------|------------------|---------------------|---------------|------------------|---------------------|-------------------|----------------------------|
|                  | China                   | EV grid cells | e-forward cities | China               | EV grid cells | e-forward cities |                     |                   |                            |
| HDV_COAL         | -0.14                   | -0.20         | -0.88            | -0.11               | -0.18         | -1.24            | 62                  | 314               | -141                       |
| HDV_2010         | -0.29                   | -0.37         | -1.05            | -0.11               | -0.19         | -1.25            | 36                  | 355               | -21                        |
| HDV_2015         | -0.85                   | -1.04         | -2.18            | -0.12               | -0.20         | -1.29            | 31                  | 562               | 87                         |
| HDV_REN          | -0.87                   | -1.07         | -2.25            | -0.12               | -0.20         | -1.29            | -5                  | 575               | 235                        |
| LDV_COAL         | 0.51                    | 0.60          | 0.66             | -0.02               | -0.04         | -0.38            | 3                   | -90               | -60                        |
| LDV_2010         | 0.38                    | 0.46          | 0.51             | -0.02               | -0.04         | -0.39            | -22                 | -59               | 48                         |
| LDV_2015         | -0.16                   | -0.20         | -0.62            | -0.03               | -0.05         | -0.43            | -27                 | 145               | 155                        |
| LDV_REN          | -0.17                   | -0.21         | -0.61            | -0.03               | -0.06         | -0.43            | -64                 | 152               | 306                        |
| HDV_2015 (2014m) | -0.56                   | -0.70         | -1.70            | -0.13               | -0.21         | -1.33            | 31                  | 485               | 54                         |
| LDV_2015 (2014m) | -0.01                   | -0.04         | -0.46            | -0.04               | -0.06         | -0.46            | -27                 | 108               | 137                        |
| NO_TRA           | -3.21                   | -3.95         | -7.42            | -0.46               | -0.75         | -2.97            | n/a                 | 1877              | 703                        |
| NO_ENE           | -21.15                  | -25.13        | -40.85           | -0.30               | -0.39         | -1.15            | n/a                 | 7687              | 3321                       |

<sup>a</sup>Health impact only

**Table S2.** Summary of EV co-benefits: mean changes in PM<sub>2.5</sub> ( $\mu\text{g m}^{-3}$ ) and NO<sub>2</sub> (ppb), CO<sub>2</sub> emission changes (Mt yr<sup>-1</sup>), avoided mortality (deaths/January, and economic valuation (CO<sub>2</sub> + seven health endpoints) for each experiment. “2014m” refers to 2014 meteorology.

|         | NO <sub>x</sub> | SO <sub>2</sub> | BC  | PM <sub>10</sub> TR | CO  | HCHO |
|---------|-----------------|-----------------|-----|---------------------|-----|------|
| On-road | 13.3            | 0.2             | 3.5 | 0.2                 | 9.7 | 25.0 |
| Energy  | 35.3            | 27.0            | 1.4 | 11.4                | 0.8 | 0.0  |

**Table S3.** Fraction of total emissions in the on-road and energy generation sectors.

| Experiment | CO <sub>2</sub> | SO <sub>2</sub> | NO <sub>x</sub> | PM <sub>2.5</sub> |
|------------|-----------------|-----------------|-----------------|-------------------|
| COAL/2010  | 905.6           | 2.48            | 2.67            | 0.27              |
| 2015/REN   | 861.0           | 0.42            | 0.35            | 0.10              |

**Table S4.** Average coal-fired EGU emission rates.

| Experiment      | ΔPM <sub>2.5</sub> |               |                  | ΔNO <sub>2</sub> |               |                  |
|-----------------|--------------------|---------------|------------------|------------------|---------------|------------------|
|                 | China              | EV grid cells | e-forward cities | China            | EV grid cells | e-forward cities |
| HDV_COAL        | -0.25              | -1.53         | -1.52            | -0.37            | -4.21         | -4.26            |
| HDV_2010        | -0.62              | -2.19         | -2.20            | -0.38            | -4.23         | -4.28            |
| HDV_2015        | -1.86              | -4.58         | -4.53            | -0.40            | -4.29         | -4.35            |
| HDV_REN         | -1.94              | -4.79         | -4.73            | -0.41            | -4.28         | -4.34            |
| LDV_COAL        | 1.25               | 1.72          | 1.57             | -0.08            | -1.32         | -1.46            |
| LDV_2010        | 0.96               | 1.47          | 1.26             | -0.10            | -1.33         | -1.47            |
| LDV_2015        | -0.26              | -1.07         | -1.07            | -0.12            | -1.40         | -1.54            |
| LDV_REN         | -0.32              | -1.26         | -1.42            | -0.12            | -1.41         | -1.56            |
| HDV_CUR (2014m) | -1.49              | -4.37         | -4.33            | -0.42            | -4.28         | -4.37            |
| LDV_CUR (2014m) | -0.08              | -0.94         | -1.11            | -0.13            | -1.41         | -1.59            |
| NO_TRA          | -6.87              | -15.20        | -15.38           | -1.41            | -8.62         | -9.62            |
| NO_ENE          | -48.63             | -91.84        | -88.70           | -0.81            | -1.86         | -3.62            |

**Table S5.** 95<sup>th</sup> percentile PM<sub>2.5</sub> changes (μg m<sup>-3</sup>) for each experiment. “2014m” refers to 2014 meteorology
